# Supplementary material for: IL-13 Genetic Susceptibility to Bullous Pemphigoid: A Potential Target for Treatment and a Prognostic Marker
Source: PubMed Central journal article supplement (PMC8818855; doi:10.3389/fimmu.2022.824110), 2022-01-24
Supplement: DataSheet_1.pdf [file DataSheet_1.pdf]

**Supplementary Figure 1.** Linkage disequilibrium pattern of the genomic region in chromosome (chr) 2 (IL-1), chr5 (IL-4 & IL-13), chr1 (IL-10), chr6 (TNF-  $\alpha$  ), chr12 (IFN-  $\gamma$  ), chr19 (TGF-  $\beta$  )

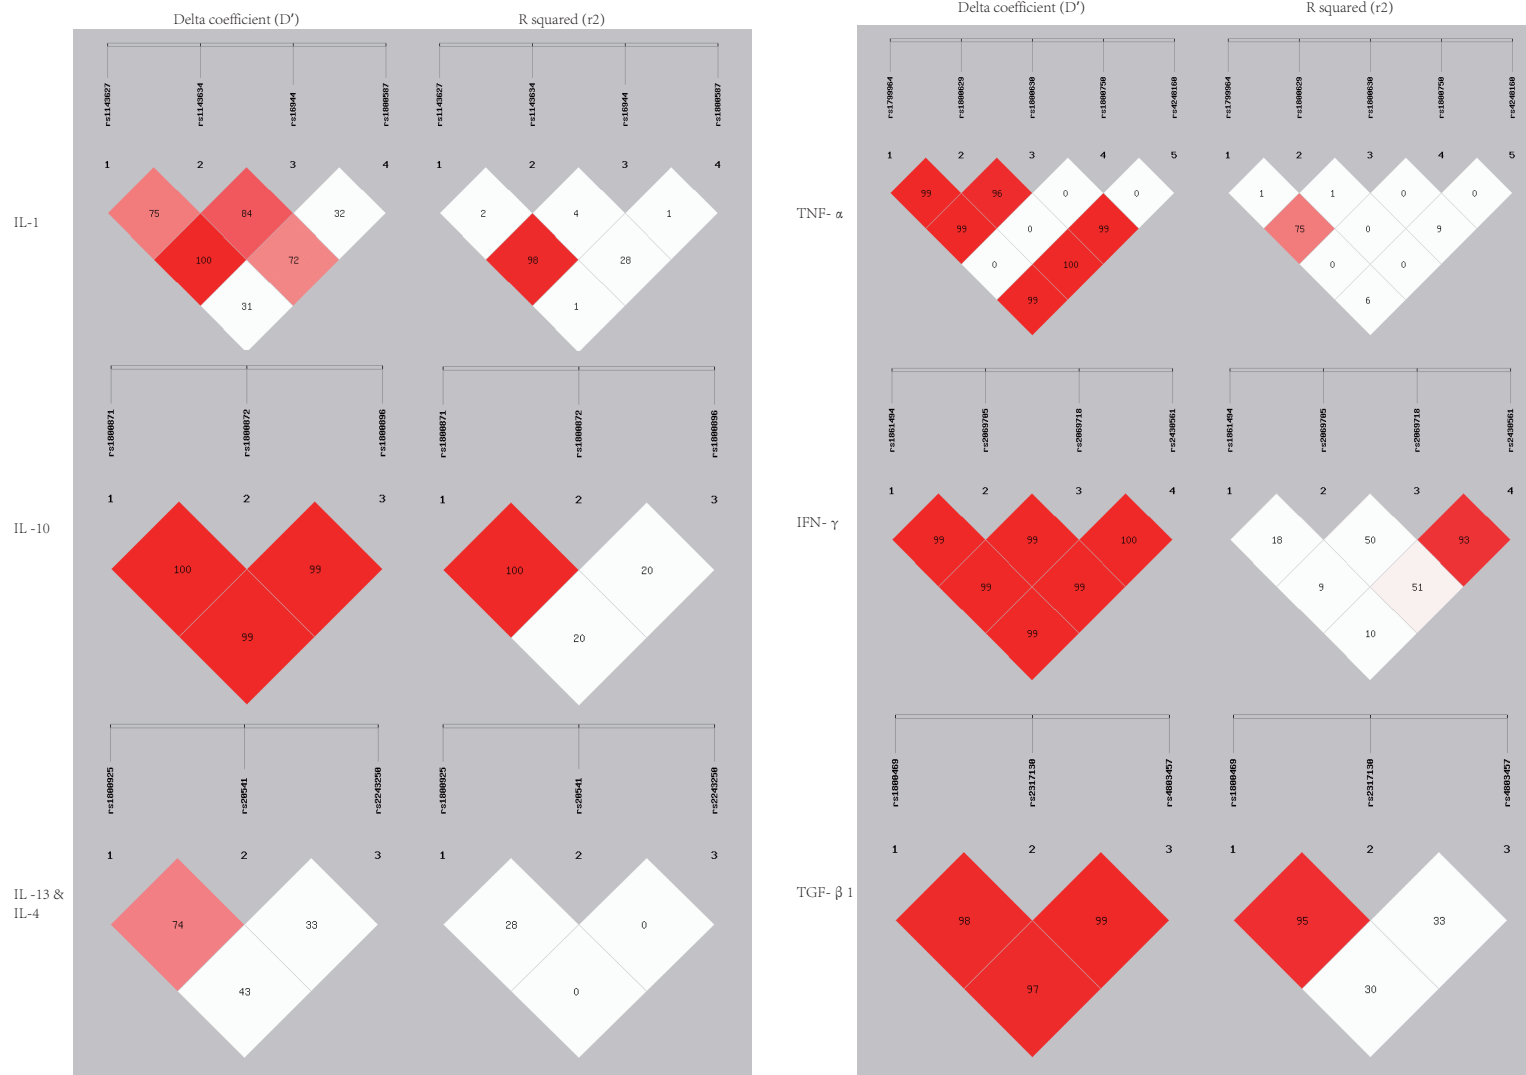

Supplementary Figure 2. Time-course curve based on Kaplan-Meier analysis to show the relationship between IL-13 and relapse.

Kaplan-Meier analysis for IL-13 rs20541

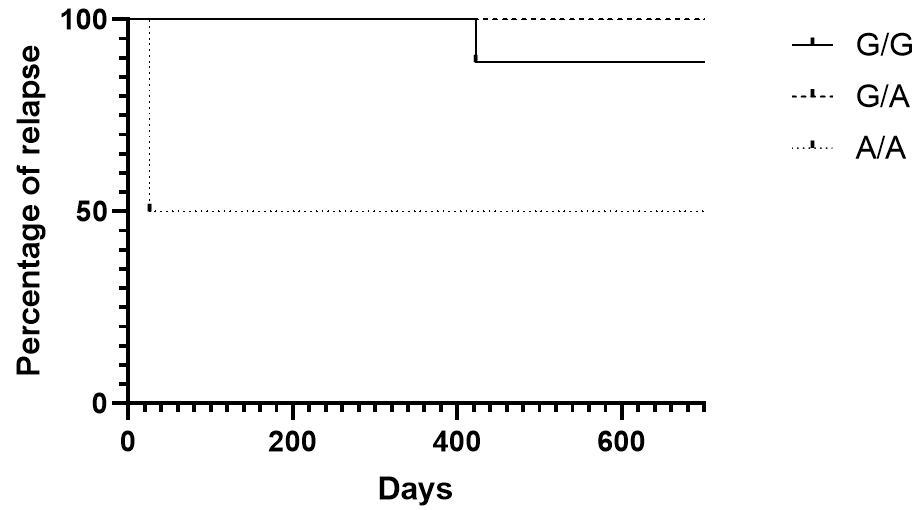

Kaplan-Meier analysis for IL-13 rs1800925

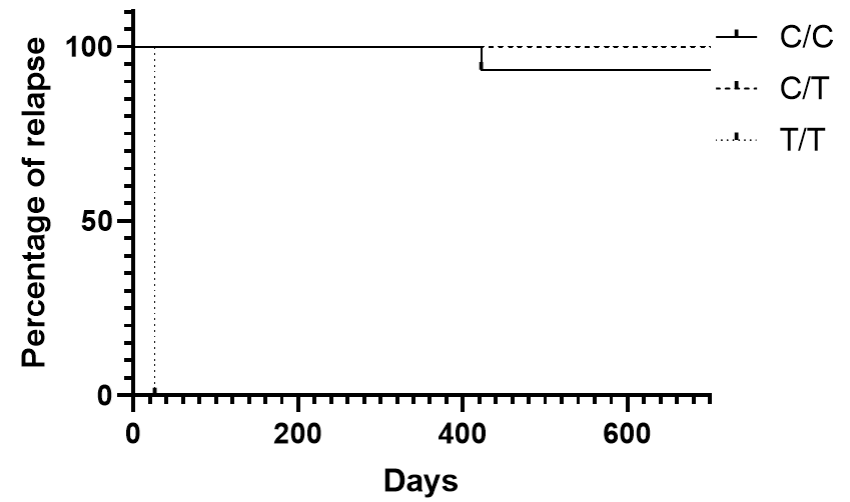

**Supplementary Table 1.** Genotype and allele frequencies of gene polymorphisms in Chinese patients with BP and respective controls.

| Gene      | Genotype/Allele | Patients | Control subjects | $\chi^2$ /OR(95% CI) | P Value |
|-----------|-----------------|----------|------------------|----------------------|---------|
| rs1800587 | GG              | 49       | 67               | 2.884                | 0.236   |
|           | AG              | 10       | 16               |                      |         |
|           | AA              | 2        | 0                | 0.823 (0.385-1.757)  | 0.614   |
|           | G               | 108      | 150              |                      |         |
|           | A               | 14       | 16               |                      |         |
| rs16944   | GG              | 19       | 28               | 0.275                | 0.872   |
|           | AG              | 27       | 40               |                      |         |
|           | AA              | 15       | 18               | 0.903 (0.567-1.439)  | 0.667   |
|           | G               | 65       | 96               |                      |         |
|           | A               | 57       | 76               |                      |         |
| rs1143627 | AA              | 17       | 24               | 0.12                 | 0.942   |
|           | AG              | 27       | 35               |                      |         |
|           | GG              | 15       | 18               | 0.915(0.566-1.480)   | 0.719   |
|           | A               | 61       | 83               |                      |         |
|           | G               | 57       | 71               |                      |         |
| rs1143634 | GG              | 55       | 76               | 0.137                | 0.934   |
|           | AG              | 4        | 7                |                      |         |
|           | AA              | 2        | 3                | 1.165(0.468-2.903)   | 0.743   |
|           | G               | 114      | 159              |                      |         |
|           | A               | 8        | 13               |                      |         |
| rs2243250 | TT              | 42       | 53               | 0.296                | 0.862   |
|           | CT              | 16       | 24               |                      |         |
|           | CC              | 3        | 5                |                      |         |

|           |    |     |     |                    |       |
|-----------|----|-----|-----|--------------------|-------|
| rs1800795 | T  | 100 | 130 | 1.189(0.655-2.158) | 0.569 |
|           | C  | 22  | 34  |                    |       |
|           | GG | 60  | 85  | 0                  | 1     |
|           | CG | 0   | 0   |                    |       |
|           | CC | 0   | 0   |                    |       |
| rs1800896 | G  | 120 | 170 | —                  | 1     |
|           | C  | 0   | 0   |                    |       |
|           | TT | 49  | 65  | 0.242              | 0.623 |
|           | CT | 11  | 18  |                    |       |
|           | CC | 0   | 0   |                    |       |
| rs1800871 | T  | 109 | 148 | 1.205(0.547-2.655) | 0.643 |
|           | C  | 11  | 18  |                    |       |
|           | AA | 29  | 35  | 1.545              | 0.462 |
|           | AG | 19  | 33  |                    |       |
|           | GG | 13  | 13  |                    |       |
| rs1800872 | A  | 77  | 103 | 0.980(0.602-1.596) | 0.936 |
|           | G  | 45  | 59  |                    |       |
|           | TT | 29  | 35  | 2.012              | 0.57  |
|           | GT | 19  | 33  |                    |       |
|           | GG | 12  | 13  |                    |       |
| rs1799964 | T  | 77  | 103 | 1.026(0.627-1.677) | 0.919 |
|           | G  | 43  | 59  |                    |       |
|           | TT | 43  | 60  | 0.315              | 0.854 |
|           | CT | 14  | 18  |                    |       |
|           | CC | 3   | 6   |                    |       |
|           | T  | 100 | 138 | 1.087(0.584-2.024) | 0.793 |
|           | C  | 20  | 30  |                    |       |

|           |    |     |     |                    |       |
|-----------|----|-----|-----|--------------------|-------|
| rs1800630 | CC | 48  | 63  |                    |       |
|           | AC | 9   | 17  | 0.809              | 0.667 |
|           | AA | 2   | 4   |                    |       |
| rs361525  | C  | 105 | 143 |                    |       |
|           | A  | 13  | 25  | 1.412(0.690-2.889) | 0.343 |
|           | GG | 55  | 80  |                    |       |
|           | AG | 5   | 5   | 0.329              | 0.566 |
|           | AA | 0   | 0   |                    |       |
| rs1800629 | G  | 115 | 165 |                    |       |
|           | A  | 5   | 5   | 0.697(0.197-2.463) | 0.741 |
|           | GG | 53  | 70  |                    |       |
|           | AG | 7   | 12  | 0.992              | 0.609 |
|           | AA | 0   | 1   |                    |       |
| rs4248160 | G  | 113 | 152 |                    |       |
|           | A  | 7   | 14  | 1.487(0.581-3.804) | 0.405 |
|           | GG | 59  | 83  |                    |       |
|           | AG | 2   | 0   | 3.496              | 0.174 |
|           | AA | 0   | 1   |                    |       |
| rs1800750 | G  | 120 | 166 |                    |       |
|           | A  | 2   | 2   | 0.723(0.100-5.204) | 0.746 |
|           | GG | 60  | 83  |                    |       |
|           | AG | 0   | 0   | 0                  | 1     |
|           | AA | 0   | 0   |                    |       |
| rs2069705 | G  | 120 | 166 |                    |       |
|           | A  | 0   | 0   | —                  | 1     |
|           | GG | 39  | 50  |                    |       |
|           | AG | 18  | 27  | 0.35               | 0.84  |
|           |    |     |     |                    |       |

|           |    |     |     |                    |       |
|-----------|----|-----|-----|--------------------|-------|
|           | AA | 4   | 4   |                    |       |
|           | G  | 96  | 127 | 1.018(0.574-1.804) | 0.952 |
|           | A  | 26  | 35  |                    |       |
| rs1861494 | TT | 24  | 25  |                    |       |
|           | CT | 26  | 39  | 0.915              | 0.633 |
|           | CC | 11  | 14  |                    |       |
|           | T  | 74  | 89  | 1.161(0.717-1.880) | 0.545 |
|           | C  | 48  | 67  |                    |       |
| rs2069718 | AA | 48  | 63  |                    |       |
|           | AG | 10  | 19  | 1.556              | 0.669 |
|           | GG | 2   | 2   |                    |       |
|           | A  | 106 | 145 | 1.201(0.590-2.443) | 0.613 |
|           | G  | 14  | 23  |                    |       |
| rs2317130 | TT | 16  | 22  |                    |       |
|           | CT | 34  | 38  | 1.245              | 0.537 |
|           | CC | 11  | 20  |                    |       |
|           | T  | 66  | 82  | 1.121(0.699-1.798) | 0.635 |
|           | C  | 56  | 78  |                    |       |
| rs1800469 | TT | 16  | 22  |                    |       |
|           | CT | 35  | 43  | 2.001              | 0.368 |
|           | CC | 9   | 21  |                    |       |
|           | T  | 67  | 87  | 1.235(0.773-1.972) | 0.376 |
|           | C  | 53  | 85  |                    |       |

---

**Supplementary Table 2.** Haplotype patterns with their frequencies in the population.

|               | Haplotype | Case (frequency) | Control (frequency) | Chi2  | Fisher's P | Pearson's P | Odds Ratio (95%CI)   |
|---------------|-----------|------------------|---------------------|-------|------------|-------------|----------------------|
| IL-1          | A A G A   | 6.00(0.051)      | 6.91(0.045)         | 0.037 | 0.847      | 0.847       | 1.117 (0.364-3.427)  |
|               | A A G G   | 0.00(0.000)      | 1.06(0.007)         | -     | -          | -           | -                    |
|               | A G G A   | 1.95(0.016)      | 3.90(0.025)         | 0.271 | 0.603      | 0.603       | 0.633 (0.111-3.597)  |
|               | A G G G   | 53.05(0.450)     | 71.13(0.462)        | 0.126 | 0.723      | 0.723       | 0.916 (0.565-1.486)  |
|               | G A A A   | 0.00(0.000)      | 0.00(0.000)         | -     | -          | -           | -                    |
|               | G A A G   | 0.00(0.000)      | 1.03(0.007)         | -     | -          | -           | -                    |
|               | G G A A   | 6.05(0.051)      | 4.19(0.027)         | 0.999 | 0.318      | 0.318       | 1.892 (0.532-6.733)  |
|               | G G A G   | 50.95(0.432)     | 64.78(0.421)        | 0.002 | 0.967      | 0.967       | 1.010 (0.621-1.643)  |
|               | G G G G   | 0.00(0.000)      | 1.00(0.006)         | -     | -          | -           | -                    |
| IL-10         | A T T     | 77.00(0.642)     | 100.00(0.633)       | 0.023 | 0.881      | 0.881       | 1.039 (0.634-1.702)  |
|               | G G C     | 11.00(0.092)     | 18.00(0.114)        | 0.362 | 0.548      | 0.548       | 0.785 (0.356-1.731)  |
|               | G G T     | 32.00(0.267)     | 40.00(0.253)        | 0.065 | 0.799      | 0.799       | 1.073 (0.625-1.842)  |
|               | A T C     | 0.00(0.000)      | 0.00(0.000)         | -     | -          | -           | -                    |
| TNF- $\alpha$ | C A A G G | 0.00(0.000)      | 1.27(0.008)         | -     | -          | -           | -                    |
|               | C G A G A | 2.00(0.017)      | 2.00(0.012)         | 0.109 | 0.742      | 0.742       | 1.392 (0.193-10.030) |
|               | C G A G G | 11.00(0.095)     | 19.73(0.122)        | 0.532 | 0.466      | 0.466       | 0.749 (0.343-1.633)  |
|               | C G C G G | 5.00(0.043)      | 5.00(0.031)         | 0.278 | 0.598      | 0.598       | 1.403 (0.397-4.962)  |
|               | T A C G G | 7.00(0.060)      | 10.73(0.066)        | 0.046 | 0.83       | 0.83        | 0.898 (0.336-2.401)  |
|               | T G C G G | 91.00(0.784)     | 123.27(0.761)       | 0.119 | 0.731      | 0.731       | 1.106 (0.623-1.964)  |
| IFN- $\gamma$ | C A G A   | 0.00(0.000)      | 0.00(0.000)         | -     | -          | -           | -                    |
|               | C G A T   | 48.00(0.400)     | 67.00(0.429)        | 0.243 | 0.622      | 0.622       | 0.886 (0.546-1.436)  |
|               | T A A T   | 10.00(0.083)     | 13.00(0.083)        | 0     | 1          | 1           | 1.000 (0.423-2.366)  |

|                |         |              |              |       |       |       |                     |
|----------------|---------|--------------|--------------|-------|-------|-------|---------------------|
|                | T A G A | 14.00(0.117) | 19.00(0.122) | 0.017 | 0.897 | 0.897 | 0.952 (0.456-1.987) |
|                | T G A T | 48.00(0.400) | 57.00(0.365) | 0.344 | 0.557 | 0.557 | 1.158 (0.710-1.889) |
|                | A C T   | 49.00(0.430) | 76.00(0.481) | 0.755 | 0.385 | 0.385 | 0.806 (0.495-1.311) |
|                | A T C   | 0.00(0.000)  | 1.00(0.006)  | -     | -     | -     | -                   |
| TGF- $\beta$ 1 | G C T   | 1.00(0.009)  | 1.00(0.006)  | -     | -     | -     | -                   |
|                | G T C   | 31.00(0.272) | 43.00(0.272) | 0.001 | 0.981 | 0.981 | 0.993 (0.578-1.709) |
|                | G T T   | 33.00(0.289) | 37.00(0.234) | 1.024 | 0.312 | 0.311 | 1.327 (0.767-2.295) |



**Supplementary Table 3.** Comparison of cytokine's serum levels among patients with different genotype.

| Cytokines     | SNP       | Genotype | mean ± SD (pg/mL) | P     | Genotype | mean ± SD (pg/mL) | P       | Genotype | mean ± SD (pg/mL) | P       |
|---------------|-----------|----------|-------------------|-------|----------|-------------------|---------|----------|-------------------|---------|
| IL-1 $\alpha$ | rs1800587 | GG       | 11.01 ± 33.93     | 0.566 | GG       | 11.01 ± 33.93     | 0.027** | GA       | 2.28 ± 2.87       | 0.024** |
|               |           | GA       | 2.28 ± 2.87       |       | AA       | 68.14 ± 95.79     |         | AA       | 68.14 ± 95.79     |         |
| IL-1 $\beta$  | rs16944   | GG       | 13.68 ± 15.12     | 0.122 | GG       | 13.68 ± 15.12     | 0.9     | GA       | 75.67 ± 178.31    | 0.122   |
|               |           | GA       | 75.67 ± 178.31    |       | AA       | 7.82 ± 10.43      |         | AA       | 7.82 ± 10.43      |         |
|               | rs1143627 | AA       | 12.61 ± 15.54     | 0.139 | AA       | 12.61 ± 15.54     | 0.922   | AG       | 75.67 ± 178.31    | 0.13    |
|               |           | AG       | 75.67 ± 178.31    |       | GG       | 7.82 ± 10.43      |         | GG       | 7.82 ± 10.43      |         |
|               | rs1143634 | GG       | 43.13 ± 129.28    | 0.641 | GG       | 43.13 ± 129.28    | 0.82    | GA       | 8.13 ± 14.08      | 0.901   |
|               |           | GA       | 8.13 ± 14.08      |       | AA       | 22.47 ± 14.72     |         | AA       | 22.47 ± 14.72     |         |
| IL-4          | rs2243250 | TT       | 4.55 ± 6.57       | 0.22  | TT       | 4.55 ± 6.57       | 0.869   | CT       | 8.28 ± 14.71      | 0.495   |
|               |           | CT       | 8.28 ± 14.71      |       | CC       | 3.44 ± 3.89       |         | CC       | 3.44 ± 3.89       |         |
| IL-6          | rs1800795 | GG       | 22.59 ± 76.25     | -     | GG       |                   | -       | GC       |                   | -       |
|               |           | GC       |                   |       | CC       |                   |         | CC       |                   |         |
| IL-10         | rs1800896 | TT       | 0.92 ± 1.87       | 0.107 | TT       |                   | -       | CT       |                   | -       |
|               |           | CT       | 3.25 ± 8.44       |       | CC       |                   |         | CC       |                   |         |
|               | rs1800871 | AA       | 0.93 ± 1.82       | 0.951 | AA       | 0.93 ± 1.82       | 0.261   | AG       | 1.01 ± 2.22       | 0.353   |
|               |           | AG       | 1.01 ± 2.22       |       | GG       | 2.44 ± 7          |         | GG       | 2.44 ± 7          |         |
|               | rs1800872 | TT       | 0.93 ± 1.82       | 0.952 | TT       | 0.93 ± 1.82       | 0.241   | GT       | 1.01 ± 2.22       | 0.952   |
|               |           | GT       | 1.01 ± 2.22       |       | GG       | 2.57 ± 7.3        |         | GG       | 2.57 ± 7.3        |         |
| IL-13         | rs1800925 | CC       | 117.21 ± 262.82   | 0.357 | CC       | 117.21 ± 262.82   | 0.647   | CT       | 47.22 ± 47.5      | 0.958   |
|               |           | CT       | 47.22 ± 47.5      |       | TT       | 54.86 ± 15.05     |         | TT       | 54.86 ± 15.05     |         |
|               | rs20541   | GG       | 64.15 ± 92.62     | 0.29  | GG       | 64.15 ± 92.62     | 0.872   | AG       | 134.77 ± 313.74   | 0.46    |
|               |           | AG       | 134.77 ± 313.74   |       | AA       | 44.42 ± 22.95     |         | AA       | 44.42 ± 22.95     |         |
| TNF- $\alpha$ | rs1799964 | TT       | 50.24 ± 106.53    | 0.937 | TT       | 50.24 ± 106.53    |         | TC       | 58.06 ± 63.84     |         |

|        |           |    |                 |       |    |                   |              |    |                   |              |
|--------|-----------|----|-----------------|-------|----|-------------------|--------------|----|-------------------|--------------|
|        |           | TC | 58.06 ± 63.84   |       | CC | 1371.02 ± 1858.47 | 9.0212E-8*** | CC | 1371.02 ± 1858.47 | 3.4718E-7*** |
|        | rs1800630 | CC | 50.08 ± 100.74  | 0.601 | CC |                   | -            | CA |                   | -            |
|        |           | CA | 70.98 ± 69.13   |       | AA |                   |              | AA |                   |              |
|        | rs361525  | GG | 110.81 ± 405.08 | 0.743 | GG |                   | -            | GA |                   | -            |
|        |           | GA | 50.6 ± 43.48    |       | AA |                   |              | AA |                   |              |
|        | rs1800629 | GG | 114.6 ± 404.52  | 0.594 | GG |                   | -            | GA |                   | -            |
|        |           | GA | 16.57 ± 13.76   |       | AA |                   |              | AA |                   |              |
|        | rs4248160 | GG | 106.42 ± 388.31 | 0.802 | GG |                   | -            | AG |                   | -            |
|        |           | AG | 36.54 ± 12.4    |       | AA |                   |              | AA |                   |              |
| IFN-γ  | rs2069705 | GG | 56.52 ± 156.73  | 0.881 | GG | 56.52 ± 156.73    | 0.856        | GA | 49.98 ± 120.26    | 0.929        |
|        |           | GA | 49.98 ± 120.26  |       | AA | 42.86 ± 38.84     |              | AA | 42.86 ± 38.84     |              |
|        | rs1861494 | TT | 52.28 ± 104.57  | 0.506 | TT | 52.28 ± 104.57    | 0.145        | TC | 24.47 ± 22.11     | 0.053        |
|        |           | TC | 24.47 ± 22.11   |       | CC | 135.86 ± 306.49   |              | CC | 135.86 ± 306.49   |              |
|        | rs2069718 | AA | 49.13 ± 140.19  | 0.672 | AA | 49.13 ± 140.19    | 0.945        | GA | 71.55 ± 160.45    | 0.791        |
|        |           | GA | 71.55 ± 160.45  |       | GG | 41.91 ± 44.43     |              | GG | 41.91 ± 44.43     |              |
|        | rs2430561 | TT | 49.13 ± 140.19  | 0.669 | TT | 49.13 ± 140.19    | 0.95         | TA | 71.55 ± 160.45    | 0.856        |
|        |           | TA | 71.55 ± 160.45  |       | AA | 54.45 ± 38.19     |              | AA | 54.45 ± 38.19     |              |
| TGF-β1 | rs2317130 | TT | 995.28 ± 496.11 | 0.385 | TT | 995.28 ± 496.11   | 0.803        | TC | 848.72 ± 302.98   | 0.61         |
|        |           | TC | 848.72 ± 302.98 |       | CC | 1040.16 ± 315.06  |              | CC | 1040.16 ± 315.06  |              |
|        | rs4803457 | TT |                 | -     | TT | 902.42 ± 322.19   | 0.389        | TC |                   | -            |
|        |           | TC |                 |       | CC | 1011.7 ± 514.47   |              | CC |                   |              |
|        | rs1800469 | GG | 995.28 ± 496.11 | 0.348 | GG | 995.28 ± 496.11   | 0.967        | GA | 877.41 ± 335.23   | 0.459        |
|        |           | GA | 877.41 ± 335.23 |       | AA | 988.27 ± 242.26   |              | AA | 988.27 ± 242.26   |              |

**Supplementary Table 4. Survival analysis for the relationship between the relapse and IL-13 genotypes.** A significant correlation was found between the IL-13 SNPs rs20541(P=0.048) or rs1800925 (P<0.001) and the relapse rate in the BP patients, respectively.

| IL-13 SNPs | Genotype | Relapse | Relapse Free | P-Value <sup>1</sup> |
|------------|----------|---------|--------------|----------------------|
| rs20541    | G/G      | 1       | 8            | 0.048*               |
|            | A/G      | 0       | 10           |                      |
|            | A/A      | 1       | 1            |                      |
| rs1800925  | C/C      | 1       | 14           | 0.000042**           |
|            | C/T      | 0       | 5            |                      |
|            | T/T      | 1       | 0            |                      |

<sup>1</sup>\*denotes P<0.05, \*\*denotes P<0.01.
